# Supplementary material for: Possible Relevance of Soluble Luteinizing Hormone Receptor during Development and Adulthood in Boys and Men
Source: MDPI journal article supplement (doi:10.3390/cancers13061329), 2021-03-16
Supplement: s1 [file s1]

Article

# Possible Relevance of Soluble Luteinizing Hormone Receptor during Development and Adulthood in Boys and Men

Li Juel Mortensen, Mette Lorenzen, Anne Jørgensen, Jakob Albrethsen, Niels Jørgensen, Søren Møller, Anna-Maria Andersson, Anders Juul and Martin Blomberg Jensen

## Supplementary figures and table

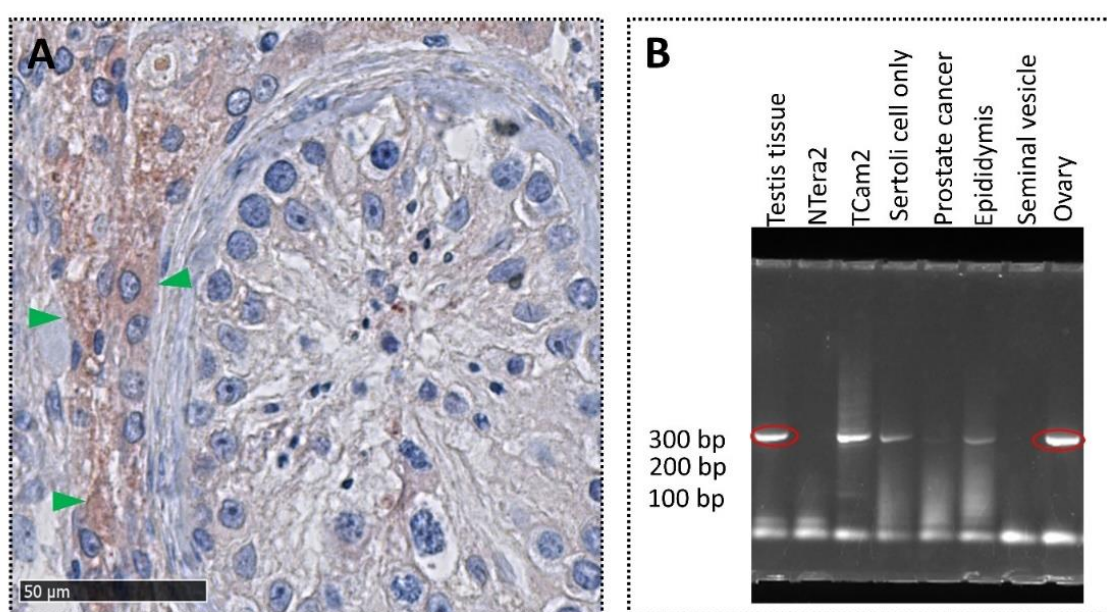

**Figure 1.** Expression of sLHCGR. (A): Immunohistochemistry of human adult testis tissue stained with Santa Cruz Biotechnology (SC-25828) shows expression of LHCGR in the membrane and cytoplasm of the Leydig cells (green arrows). Image is from  $\times 40$  magnification. (B): RT-PCR with a primer spanning exon 11 of LHCGR in samples of testis tissue, adjacent reproductive organs and cell lines. The band of approximately 300 bp marked with red circles were sequenced and proved to be LHCGR.

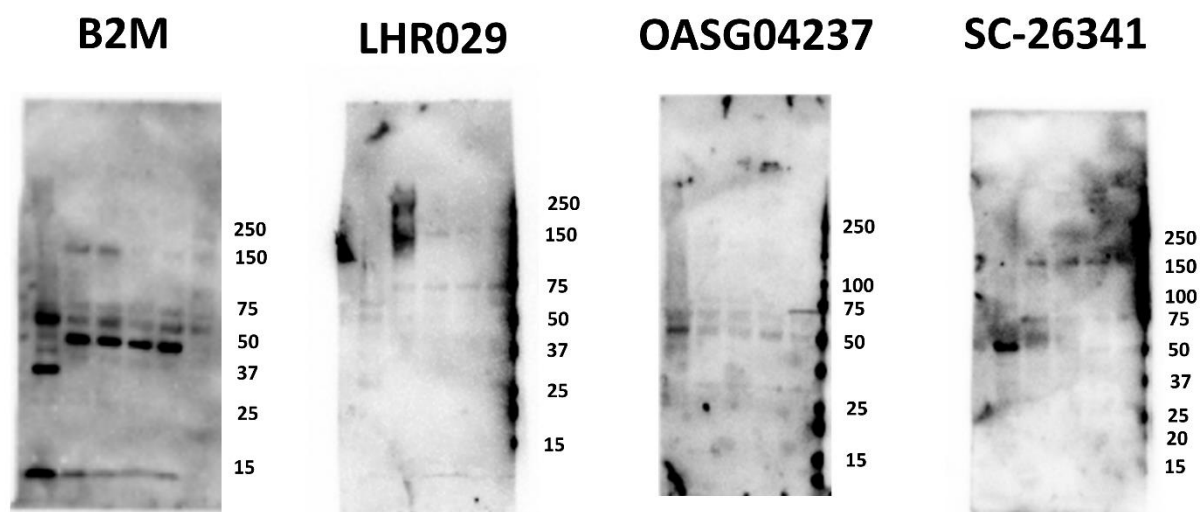

|                      | Testis tissue | Serum high sLHCGR | Serum low sLHCGR |
|----------------------|---------------|-------------------|------------------|
| 12 kDa <b>B2M</b>    | 4144          | 1797              | 1226             |
| 75 kDa <b>LHR029</b> | NA            | 2126              | 2095             |
| <b>OASG04237</b>     | 973           | 495               | 498              |
| <b>SC-26341</b>      | NA            | 1446              | 400              |
| 50 kDa <b>LHR029</b> | 1445          | 870               | 506              |
| <b>OASG04237</b>     | 851           | 351               | 366              |
| <b>SC-26341</b>      | 1462          | NA                | 66               |

**Figure 2.** Uncropped Western Blot using three different antibodies targeting LHCGR. Loading from left: testis tissue, serum from healthy man with high sLHCGR, serum from healthy man with low sLHCGR, serum from man with testicular cancer (seminoma), serum from man with testicular cancer (non-seminoma). Table shows densitometry readings performed in Image-J with measured peak intensity and calculated area under the peak.

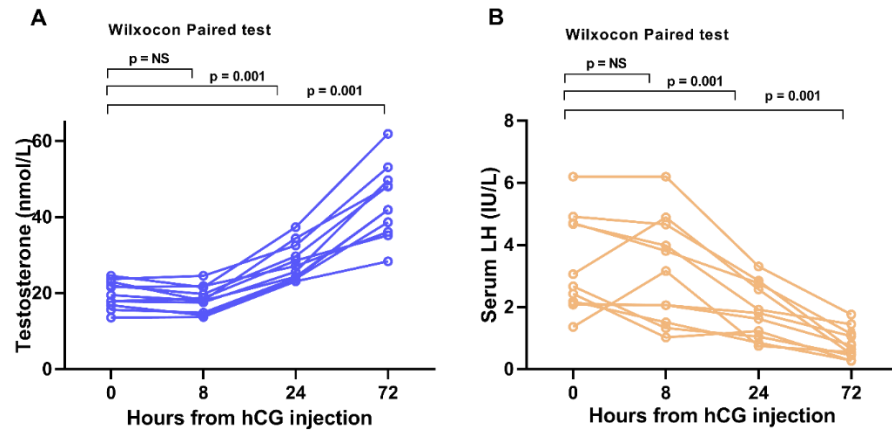

**Figure 3.** Eleven healthy men injected with 5000 IU hCG (**A**): Changes in testosterone after 8, 24 hours and 72 hours. (**B**): Changes in LH after 8, 24 hours and 72 hours. After correcting for multiple comparison using Bonferroni: level of significance <0.0167.

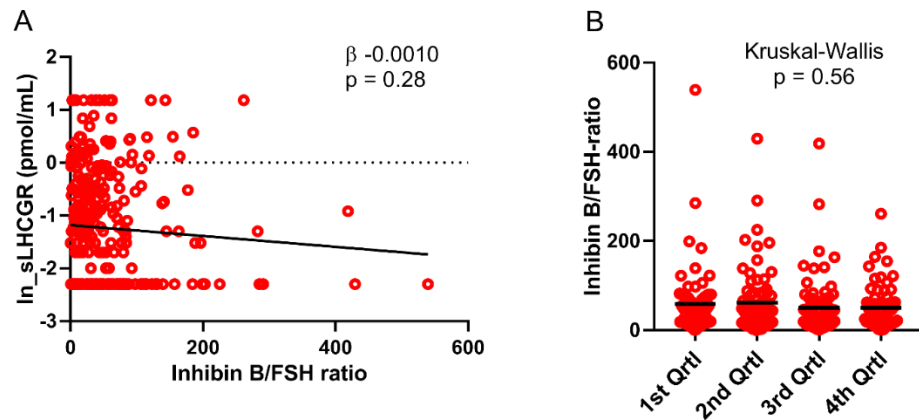

**Figure 4.** No significant association between sLHCGR and Inhibin B/FSH-ratio in 297 infertile men. (**A**): Crude association (**B**): sLHCGR split in quartiles, with a downward trend in Inhibin B/FSH ratio, but not this was not statistically significantly different between groups.

**Table 1.** Table shows proteins in serum from a pregnant woman, depleted of albumin and IgG and analyzed by LC-MS/MS. SDS- gel electrophoresis fragments of 35 kDa, 50 kDa, 60 kDa and 75 kDa were included. The Mascot Score is a statistical score that reflects how the MS data match the database. The higher the Mascot score the higher the confidence of a protein being identified. High abundant protein will often produce relatively high Mascot scores. The Mascot score is above the 95% confidence level for all the reported proteins in this table. We did not detect sLHCGR by LC-MS/MS in the current sample which could be due to low serum-concentrations.

| Sample A: 35 KD                              |                 | Sample B: 50 KD                             |                 |
|----------------------------------------------|-----------------|---------------------------------------------|-----------------|
| Protein Name                                 | Mascot Database | Protein Name                                | Mascot database |
| complement C 3                               | 1857            | albumin                                     | 2303            |
| alpha-1-antitrypsin                          | 1728            | vitamin D-binding protein                   | 1741            |
| apolipoprotein A-I                           | 1375            | complement C3                               | 1592            |
| albumin                                      | 1145            | alpha-1 antitrypsin                         | 1246            |
| ceruplasmin                                  | 1068            | ceruplasmin                                 | 1032            |
| prothrombin                                  | 857             | serotranferrin                              | 881             |
| serotransferrin                              | 846             | apolipoprotein A-I                          | 852             |
| immunoglobulin kappa                         | 772             | haptoglobin                                 | 830             |
| haptoglobin                                  | 692             | leucine-rich alpha-2-glycoprotein           | 785             |
| immunoglobulin lamda-1 light chain           | 597             | complement C4-A                             | 688             |
| inter-alpha-trypsin inhibitor heavy chain H4 | 597             | sex-hormone binding globulin                | 633             |
| apolipoprotein D                             | 552             | paraoxonase                                 | 446             |
| immunoglobulin lambda constant 2             | 543             | interalpha-trypsin inhibitor heavy chain H4 | 423             |
| apolipoprotein B-100                         | 501             | alpha-2-HS-glycoprotein                     | 416             |
| inter-alpha-trypsin inhibitor heavy chain H2 | 475             | clusterin                                   | 377             |
| angiotensinogen                              | 473             | prothrombin                                 | 359             |
| vitamin D-binding protein                    | 431             | angiotensinogen                             | 323             |
| complement C4-A                              | 425             | alpha-2-antiplasmin                         | 320             |
| clusterin                                    | 407             | kininogen-1                                 | 304             |
| transthyretin                                | 310             | Ig alpha-1 chain C region                   | 297             |
| apolipoprotein A-II                          | 263             | alpha-1-acid glycoprotein                   | 288             |
| immunoglobulin kappa vairabel 3-20           | 259             | zinc-alpha-2-glycoprotein                   | 281             |
| complement C5                                | 226             | alpha-1-acid glycoprotein 2                 | 260             |
| paraoxonase                                  | 220             | hemopexin                                   | 256             |
| immunoglobulin kappa variable 2D-28          | 205             | apolipoprotein A-II                         | 233             |
| alpha-1B-glycoprotein                        | 198             | alpha-2-macroglobulin                       | 210             |
| apolipoprotein M                             | 192             | immunoglobulin heavy constant gamma 2       | 192             |
| amyloid P-component                          | 190             | antithrombin-III                            | 188             |
| galactin-3-binding protein                   | 174             | immunoglobulin gamma-1 heavy chain          | 167             |
| coagulations factor xII                      | 155             | beta-2 glycoprotein 1                       | 154             |
| apolipoprotein E                             | 151             | alpha-1B-glycoprotein                       | 151             |
| immunoglobulin gamma 1 heavy chain           | 148             | immunoglobulin heavy constant mu            | 90              |
| immunoglobulin lambda variable 3-9           | 144             |                                             |                 |
| immunoglobulin kappa variable 1-5            | 133             |                                             |                 |
| protein AMBP                                 | 126             |                                             |                 |
| immunoglobulin lambda variable 1-47          | 114             |                                             |                 |
| immunoglobulin J chain                       | 75              |                                             |                 |
| hemoglobin subunit beta-A                    | 64              |                                             |                 |

| Sample C: 60 KD                              |                 | Sample D: 75 KD                              |                 |
|----------------------------------------------|-----------------|----------------------------------------------|-----------------|
| Protein Name                                 | Mascot Database | Protein Name                                 | Mascot Database |
| albumin                                      | 1411            | serotransferrin                              | 4334            |
| alpha-1-antitrypsin                          | 680             | albumin                                      | 3859            |
| serotransferrin                              | 528             | ceruplasmin                                  | 1700            |
| vitamin D-binding protein                    | 520             | complement C3                                | 1402            |
| albumin                                      | 401             | alpha-1B-glycoprotein                        | 1290            |
| immunoglobulin heavy constant alpha 1        | 314             | alpha-1-antitrypsin                          | 1106            |
| inter-alpha-trypsin inhibitor heavy chain H4 | 285             | hemopexin                                    | 858             |
| complement C3                                | 211             | immunoglobulin heavy constant alpha 1        | 702             |
| ceruplasmin                                  | 209             | apolipoprotein A-I                           | 505             |
| immunoglobulin gamma-1 heavy chain           | 146             | immunoglobulin heavy constant mu             | 500             |
| vitronectin                                  | 94              | alpha-2-macroglobulin                        | 498             |
|                                              |                 | kininogen-1                                  | 451             |
|                                              |                 | afamin                                       | 355             |
|                                              |                 | haptoglobin                                  | 328             |
|                                              |                 | inter-alpha-trypsin inhibitor heavy chain H4 | 297             |
|                                              |                 | alpha-1-antichymotrypsin                     | 279             |
|                                              |                 | lumican                                      | 272             |
|                                              |                 | angiotensinogen                              | 256             |
|                                              |                 | apolipoprotein A-II                          | 228             |
|                                              |                 | complement C4-A                              | 184             |
|                                              |                 | apolipoprotein B-100                         | 174             |
|                                              |                 | immunoglobulin gamma-1 heavy chain           | 154             |
